# Supplementary material for: Optimizing the Extraction of Bioactive Compounds (Polyphenols, Lipids, and Alpha-Tocopherol) from Almond Okara to Unlock Its Potential as Functional Food
Source: MDPI journal article supplement (doi:10.3390/foods13172828), 2024-09-05
Supplement: s1 [file foods-3157709-supplementary.pdf › foods-3157709-supplementary.pdf]

Supplementary Materials

# Optimizing the Extraction of Bioactive Compounds (Polyphenols, Lipids, and Alpha-Tocopherol) from Almond Okara to Unlock its Potential as Functional Food

**Table S1.** The experimental points of each variable for the solid–liquid extraction of polyphenols from okara.

| Run | Temperature<br>°C (Coded Level) | Ethanol Concentration<br>% (Coded Level) | Ratio Okara/Solvent<br>g: mL (Coded Level) |
|-----|---------------------------------|------------------------------------------|--------------------------------------------|
| 1   | 20 (−1)                         | 0 (−1)                                   | 1 :10 (−1)                                 |
| 2   | 60 (+1)                         | 0 (−1)                                   | 1 :10 (−1)                                 |
| 3   | 20 (−1)                         | 50 (+1)                                  | 1 :10 (−1)                                 |
| 4   | 60 (+1)                         | 50 (+1)                                  | 1 :10 (−1)                                 |
| 5   | 20 (−1)                         | 0 (−1)                                   | 1 :50 (+1)                                 |
| 6   | 60 (+1)                         | 0% (−1)                                  | 1 :50 (+1)                                 |
| 7   | 20 (−1)                         | 50 (+1)                                  | 1 :50 (+1)                                 |
| 8   | 60 (+1)                         | 50 (+1)                                  | 1 :50 (+1)                                 |
| 9   | 40 (0)                          | 25 (0)                                   | 1 :30 (0)                                  |
| 10  | 40 (0)                          | 25 (0)                                   | 1 :30 (0)                                  |
| 11  | 40 (0)                          | 25 (0)                                   | 1 :30 (0)                                  |
| 12  | 20 (−1)                         | 25 (0)                                   | 1 :30 (0)                                  |
| 13  | 60 (+1)                         | 25 (0)                                   | 1 :30 (0)                                  |
| 14  | 40 (0)                          | 0 (−1)                                   | 1 :30 (0)                                  |
| 15  | 40 (0)                          | 50 (+1)                                  | 1 :30 (0)                                  |
| 16  | 40 (0)                          | 25 (0)                                   | 1 :10 (−1)                                 |
| 17  | 40 (0)                          | 25 (0)                                   | 1 :50 (+1)                                 |

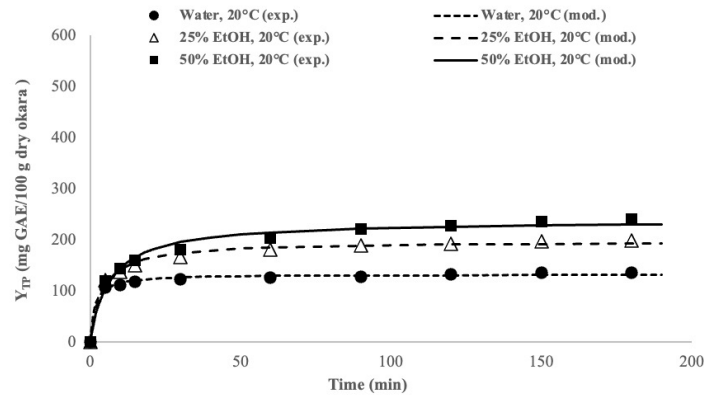

(a)

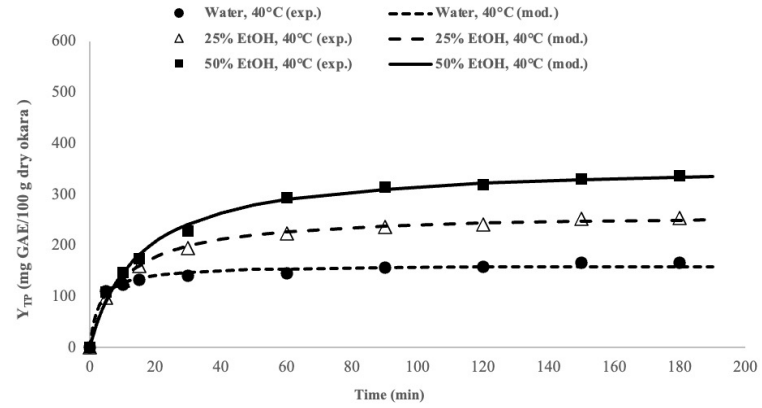

(b)

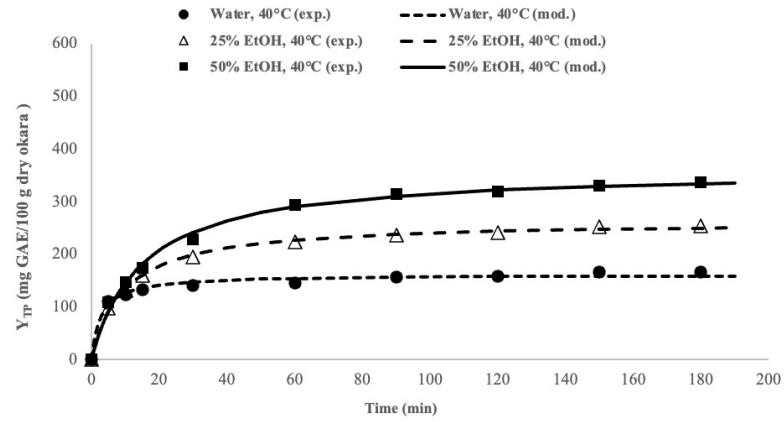

(c)

**Figure S1.** Experimental and predicted total phenolic content during solid–liquid extraction from okara with three different solvents: water (a), ethanol 25% (b), and ethanol 50% (c) at three extraction temperatures (20 °C, 40 °C and 60 °C).
